# Supplementary material for: Gesundheit und Fitness von deutschen Schulkindern
Source: Springer Nature journal article supplement (doi:10.1007/s00112-020-00882-3), 2020-02-25
Supplement: MOESM1 [file 17741728]

**Tabelle S1: Vergleich der Kinder mit und ohne Blutentnahme**

|                             | <b>Ohne BE (n=76)</b> | <b>Mit BE (n=281)</b> | <b>p</b> |
|-----------------------------|-----------------------|-----------------------|----------|
| Weibliches Geschlecht       | 36 (47,3%)            | 130 (46,3%)           | 0,864    |
| 2. Klasse                   | 44 (57,9%)            | 161 (57,3%)           | 0,925    |
| Alter (Jahre)               | 9,6 ± 1,7             | 9,6 ± 1,7             | 0,996    |
| Gewicht SDS                 | -0,4 ± 1,4            | -0,4 ± 1,2            | 0,914    |
| Größe SDS                   | -1,0 ± 1,3            | -0,7 ± 1,2            | 0,142    |
| BMI SDS                     | 0,5 ± 1,3             | 0,3 ± 1,1             | 0,194    |
| Bauchumfang SDS             | 1,8 ± 1,0             | 1,6 ± 1,0             | 0,090    |
| Systolischer Blutdruck SDS  | 0,0 ± 0,9             | -0,0 ± 0,9            | 0,531    |
| Diastolischer Blutdruck SDS | -0,4 ± 0,8            | -0,3 ± 0,8            | 0,430    |
| PWV SDS                     | 0,4 ± 1,0             | 0,3 ± 1,0             | 0,572    |

Abk.: **BE** Blutentnahme, **BMI** body mass index, **PWV** Pulswellengeschwindigkeit, **SDS** standard deviation score

**Tabelle S2: Univariate lineare Regressionsanalyse für PWV SDS als abhängige Variable**

| Variable                                   | $\beta$ | SE    | p-Wert           |
|--------------------------------------------|---------|-------|------------------|
| Weibliches Geschlecht                      | -0,021  | 0,100 | 0,833            |
| Alter                                      | -0,060  | 0,030 | <b>0,047</b>     |
| Gewicht SDS                                | 0,206   | 0,039 | <b>&lt;0,001</b> |
| Größe SDS                                  | 0,098   | 0,041 | <b>0,018</b>     |
| BMI SDS                                    | 0,226   | 0,042 | <b>&lt;0,001</b> |
| BMI - Klassifizierung                      |         |       |                  |
| BMI $\leq$ 90. Pzt, n=271                  | REF     |       |                  |
| Übergewicht (BMI >90. Pzt.), n=43          | 0,408   | 0,148 | <b>0,006</b>     |
| Adipositas (BMI >97. Pzt.), n=43           | 0,901   | 0,147 | <b>&lt;0,001</b> |
| Bauchumfang SDS                            | 0,258   | 0,049 | <b>&lt;0,001</b> |
| Viszerale Adipositas (Bauchumfang >97.Pzt) | 0,467   | 0,099 | <b>&lt;0,001</b> |
| Systolischer Blutdruck SDS, n=356          | 0,435   | 0,051 | <b>&lt;0,001</b> |
| Diastolischer Blutdruck SDS, n=356         | 0,477   | 0,058 | <b>&lt;0,001</b> |
| Gesamtcholesterin (mg/dl), n=279           | 0,001   | 0,002 | 0,649            |
| HDL (mg/dl), n=278                         | -0,012  | 0,005 | <b>0,008</b>     |
| LDL (mg/dl), n=278                         | 0,005   | 0,002 | <b>0,040</b>     |
| Triglyzeride (mg/dl), n=279                | 0,004   | 0,001 | <b>0,003</b>     |
| Harnsäure (mg/dl), n=279                   | 0,095   | 0,056 | 0,089            |
| GPT (U/l), n=278                           | 0,016   | 0,006 | <b>0,009</b>     |
| Glucose (mg/dl), n=141                     | 0,002   | 0,009 | 0,804            |
| HbA <sub>1c</sub> (%), n=141               | 0,051   | 0,263 | 0,848            |
| GFR (ml/min/1,73 m <sup>2</sup> ), n=278   | 0,003   | 0,003 | 0,266            |
| Hämoglobin (g/dl), n=277                   | 0,077   | 0,061 | 0,206            |
| hochsensitives CRP (mg/l), n=276           | 0,016   | 0,011 | 0,146            |
| Vitamin D (ng/ml), n=277                   | 0,002   | 0,007 | 0,735            |
| Max. Leistungsfähigkeit (Watt/kg), n=341   | -0,289  | 0,074 | <b>&lt;0,001</b> |
| Seitsprünge (Anzahl), n=310                | -0,022  | 0,007 | <b>0,003</b>     |
| 20m Sprint (sec), n=321                    | 0,156   | 0,115 | 0,175            |
| Rumpfbeuge (cm), n=274                     | 0,003   | 0,008 | 0,710            |
| Medienkonsum (h/Woche), n=313              | 0,012   | 0,004 | <b>0,009</b>     |
| Beidseitiger Migrationsstatus              | 0,188   | 0,100 | 0,060            |
| Elterlicher Bildungsstatus                 |         |       |                  |
| Niedrig, n=88                              | REF     |       |                  |
| Mittel, n=146                              | -0,260  | 0,126 | <b>0,040</b>     |
| Hoch, n=96                                 | -0,016  | 0,138 | 0,907            |

Abk.: **BMI** body mass index, **GFR** glomeruläre Filtrationsrate, **PWV** Pulswellengeschwindigkeit, **Pzt.** Perzentile, **SDS** standard deviation score, **SE** standard error

**Tabelle S3: Kardiovaskuläre Parameter und Fitnessparameter, in Abhängigkeit von Migrationshintergrund und Geschlecht**

|                                          | Alle (n=357)                                  |                         | p                                             | Jungen (n=191)         |                                              | p                      | Mädchen (n=166) |              | p                |
|------------------------------------------|-----------------------------------------------|-------------------------|-----------------------------------------------|------------------------|----------------------------------------------|------------------------|-----------------|--------------|------------------|
|                                          | Mittelwert ± SD                               |                         |                                               | Mittelwert ± SD        |                                              |                        | Mittelwert ± SD |              |                  |
|                                          | Kein oder einseitiger MH <sup>a</sup> (n=186) | Beidseitiger MH (n=171) | Kein oder einseitiger MH <sup>a</sup> (n=104) | Beidseitiger MH (n=87) | Kein oder einseitiger MH <sup>a</sup> (n=82) | Beidseitiger MH (n=84) |                 |              |                  |
| BMI SDS, n=356                           | 0,3 ± 1,1                                     | 0,4 ± 1,2               | 0,166                                         | 0,1 ± 1,2              | 0,4 ± 1,1                                    | 0,097                  | 0,4 ± 1,1       | 0,5 ± 1,3    | 0,864            |
| Bauchumfang SDS, n=356                   | 1,5 ± 1,0                                     | 1,7 ± 1,0               | 0,138                                         | 1,3 ± 1,0              | 1,5 ± 1,0                                    | 0,143                  | 1,8 ± 0,9       | 1,9 ± 1,0    | 0,764            |
| Systolischer Blutdruck SDS, n=356        | -0,1 ± 0,9                                    | 0,1 ± 0,9               | 0,137                                         | 0,1 ± 0,8              | 0,1 ± 0,9                                    | 0,671                  | -0,3 ± 0,9      | -0,0 ± 0,9   | 0,058            |
| Diastolischer Blutdruck SDS, n=356       | -0,3 ± 0,8                                    | -0,3 ± 0,8              | 0,746                                         | -0,2 ± 0,9             | -0,2 ± 0,8                                   | 0,930                  | -0,4 ± 0,8      | -0,5 ± 0,7   | 0,861            |
| Pulswellengeschwindigkeit SDS, n=355     | 0,3 ± 0,9                                     | 0,4 ± 1,0               | 0,060                                         | 0,3 ± 0,8              | 0,4 ± 1,0                                    | 0,339                  | 0,2 ± 1,0       | 0,2 ± 1,0    | 0,091            |
| Gesamtcholesterin (mg/dl), n=279         | 169,8 ± 29,1                                  | 169,0 ± 27,6            | 0,828                                         | 167,0 ± 29,2           | 167,9 ± 28,2                                 | 0,855                  | 173,4 ± 28,8    | 170,1 ± 27,1 | 0,501            |
| HDL (mg/dl), n=278                       | 58,1 ± 12,0                                   | 56,4 ± 12,2             | 0,250                                         | 58,9 ± 12,8            | 58,0 ± 13,3                                  | 0,686                  | 57,0 ± 11,0     | 54,8 ± 10,9  | 0,253            |
| LDL (mg/dl), n=278                       | 95,2 ± 22,9                                   | 99,6 ± 25,2             | 0,131                                         | 90,9 ± 22,7            | 97,4 ± 26,6                                  | 0,106                  | 101,0 ± 22,2    | 101,7 ± 23,8 | 0,862            |
| Triglyzeride (mg/dl), n=279              | 82,4 ± 49,8                                   | 80,3 ± 38,0             | 0,683                                         | 78,8 ± 49,7            | 73,8 ± 33,7                                  | 0,494                  | 87,3 ± 50,0     | 86,6 ± 41,1  | 0,925            |
| Harnsäure (mg/dl), n=279                 | 4,1 ± 0,9                                     | 4,2 ± 1,1               | 0,663                                         | 4,1 ± 0,9              | 4,1 ± 1,0                                    | 0,986                  | 4,2 ± 0,9       | 4,3 ± 1,1    | 0,661            |
| GPT (U/l), n=278                         | 18,3 ± 8,7                                    | 19,3 ± 9,3              | 0,352                                         | 19,0 ± 10,5            | 20,8 ± 11,6                                  | 0,328                  | 17,5 ± 5,4      | 18,0 ± 6,1   | 0,629            |
| Glucose (mg/dl), n=141                   | 98,7 ± 7,9                                    | 102,3 ± 8,5             | <b>0,012</b>                                  | 99,2 ± 7,7             | 103,3 ± 8,6                                  | <b>0,039</b>           | 98,2 ± 8,2      | 101,3 ± 8,4  | 0,119            |
| HbA <sub>1c</sub> (%), n=141             | 5,1 ± 0,3                                     | 5,2 ± 0,3               | <b>0,012</b>                                  | 5,1 ± 0,3              | 5,2 ± 0,3                                    | <b>0,043</b>           | 5,0 ± 0,3       | 5,2 ± 0,3    | 0,115            |
| GFR (ml/min/1,73 m <sup>2</sup> ), n=278 | 119 ± 20                                      | 118 ± 20                | 0,540                                         | 118 ± 16               | 114 ± 19                                     | 0,137                  | 120 ± 24        | 121 ± 20     | 0,783            |
| Hämoglobin (g/dl), n=277                 | 13,1 ± 0,8                                    | 13,0 ± 1,0              | 0,508                                         | 13,1 ± 0,9             | 13,1 ± 0,8                                   | 0,934                  | 13,1 ± 0,8      | 12,9 ± 1,2   | 0,366            |
| Max. Leistungsfähigkeit (Watt/kg), n=341 | 3,2 ± 0,7                                     | 2,9 ± 0,6               | <b>&lt;0,001</b>                              | 3,4 ± 0,8              | 3,1 ± 0,7                                    | <b>0,003</b>           | 3,0 ± 0,5       | 2,8 ± 0,5    | <b>0,027</b>     |
| Seitsprünge (Anzahl), n=310              | 26 ± 7                                        | 26 ± 7                  | 0,948                                         | 26 ± 7                 | 26 ± 8                                       | 0,827                  | 26 ± 7          | 25 ± 7       | 0,796            |
| 20m Sprint (sec), n=321                  | 4,5 ± 0,4                                     | 4,5 ± 0,5               | 0,493                                         | 4,5 ± 0,4              | 4,4 ± 0,5                                    | 0,135                  | 4,5 ± 0,4       | 4,7 ± 0,4    | <b>0,026</b>     |
| Rumpfbeuge (cm), n=274                   | -1,4 ± 7,3                                    | -0,9 ± 6,6              | 0,527                                         | -3,6 ± 6,5             | -2,6 ± 5,6                                   | 0,374                  | 1,6 ± 7,4       | 0,9 ± 7,0    | 0,583            |
| Sport außerhalb der Schule, n=325        | 111/180<br>(62%)                              | 53/145<br>(37%)         | <b>&lt;0,001</b>                              | 64/101<br>(63%)        | 37/72<br>(51%)                               | 0,115                  | 47/79 (59%)     | 16/73 (22%)  | <b>&lt;0,001</b> |
| Medienkonsum (h/Woche), n=313            | 13,4 ± 12,1                                   | 14,7 ± 11,1             | 0,326                                         | 12,2 ± 8,6             | 15,0 ± 9,8                                   | <b>0,046</b>           | 15,0 ± 15,4     | 14,4 ± 12,4  | 0,787            |

Die Anzahl der verfügbaren Werte für die gesamte Kohorte als n-Werte angegeben.

<sup>a</sup> Kinder mit einseitigem Migrationshintergrund und Kinder ohne Migrationshintergrund sind in dieser Gruppe zusammengefasst.

Abk.: **BMI** body mass index, **GFR** glomeruläre Filtrationsrate, **MH** Migrationshintergrund, **SDS** standard deviation score
